# Supplementary material
Source: HighWire-hosted journal article supplement (http://molpharm.aspetjournals.org/highwire/filestream/83243/field_highwire_adjunct_files/0/supplemental_114405.pdf)

**Article's title:** Inhibition of interleukin 10 transcription through the SMAD2/3 signaling pathway by Ca<sup>2+</sup>-activated K<sup>+</sup> channel K<sub>Ca</sub>3.1 activation in human T-cell lymphoma HuT-78 cells

**Authors:** Miki Matsui, Junko Kajikuri, Hiroaki Kito, Kyoko Endo, Yuki Hasegawa, Shinya Murate, Susumu Ohya

**Journal title:** Molecular Pharmacology (MOL # 114405)

## Supplementary Figure legends

**Figure S1.** Gene expression of Th1 and Th2 cytokines, CD25, Foxp3, LAG3, and EGR2 in HuT-78 cells and differential levels of IL-10 expression and secretion in HuT-78, Jurkat, Daudi, K562, and THP-1 cells. A: Quantitative real-time PCR assay for IFN- $\gamma$ , IL-17A, IL-4, IL-5, and IL-13 in HuT-78 cells (n=4). Expression levels were shown as a ratio to ACTB. B: Real-time PCR assay for IL-10 in HuT-78, Jurkat, Daudi, K562, and THP-1 cells (n=4 for each). C: Quantitative detection of IL-10 by ELISA assays in HuT-78, Jurkat, Daudi, K562, and THP-1 cells (n=4 for each). Supernatant samples were collected 24 hr after cultivation. D: Real-time PCR assays for CD25, Foxp3, LAG3, and EGR2 in HuT-78 cells (n=4). Results are expressed as means  $\pm$  S.D.

**Figure S2.** The SKA-31-induced hyperpolarization and current activation in HuT-78 cells in current- and voltage-clamp mode using whole-cell patch clamp recordings (at pCa 6.5). A: The time course of hyperpolarization responses induced by the application of 1  $\mu$ M SKA-31. B: Summarized results of the changes in membrane potential was obtained from 'A' (n=5 for each). C: Effects of vehicle (black), 1  $\mu$ M SKA-31 (red) and 1  $\mu$ M SKA-31 + 1  $\mu$ M TRAM-34 (blue) on the current density-voltage relationship for voltage ramp-induced currents from -120 to +60 mV in HuT-78 cells. D: Summarized results of 1  $\mu$ M SKA-31-induced outward current density at +60 mV (n=7 for each). Results are expressed as means  $\pm$  S.D. \*, \*\*:  $P < 0.05, 0.01$  vs. vehicle control,

**Figure S3.** Effects of 30 mM K<sup>+</sup>-containing solution and 1 nM thapsigargin on K<sub>Ca</sub>3.1 activators-induced inhibition of IL-10 transcription in HuT-78 cells. A: The time course of depolarization responses induced by the application of 30 and 140 mM K<sup>+</sup>-containing solution.

The fluorescent intensity of DiBAC<sub>4</sub>(3) before the application of the agents at 0 sec is expressed as 1.0. B: Disappearance of 1  $\mu$ M SKA-31-induced hyperpolarization responses by the application of 30 mM K<sup>+</sup>-containing solution. Cell numbers used for the experiments are shown in parentheses. C: Quantitative real-time PCR assay for IL-10 in HuT-78 cells treated with vehicle, DCEBIO (1  $\mu$ M), DCEBIO + 30 mM K<sup>+</sup>, SKA-31 (1  $\mu$ M), and SKA-31 + 30 mM K<sup>+</sup> for 6 hr (n=4 for each). D: Real-time PCR assay for IL-10 in HuT-78 cells treated with vehicle, 1 nM thapsigargin (TG), and TG + 10  $\mu$ M KN-62 for 6 hr (n=4 for each). Expression levels were expressed as a ratio to ACTB. Results are expressed as means  $\pm$  S.D. \*\*:  $P < 0.01$  vs. vehicle control, #:  $P < 0.01$  vs. DCEBIO-treated, \$\$:  $P < 0.01$  vs. SKA-31-treated, ¶:  $P < 0.01$  vs. TG-treated.

**Figure S4.** Time course of decreases in IL-10 transcripts by treatments with K<sub>Ca</sub>3.1 activators in HuT-78 cells. A-C: Quantitative real-time PCR assay for IL-10 in HuT-78 cells treated with vehicle (A), DCEBIO (1  $\mu$ M) (B), and SKA-31 (1  $\mu$ M) (C) for 1, 3, 6, 12, and 24 hr (n=4 for each). Expression levels were expressed as a ratio to ACTB. Results are expressed as means  $\pm$  S.D. \*\*:  $P < 0.01$  vs. at 0 hr.

**Figure S5.** Full images of cropped blots in Figure 4 (A) and Figure 7 (A)

**Figure S6.** Effects of an ATP competitive inhibitor of the TGF- $\beta$ 1 receptor (LY364947), NF- $\kappa$ B inhibitor (BAY11-7082), mTOR inhibitor (everolimus), AKT inhibitor (AZD5363), and STAT3 inhibitor (5,15-DPP) on expression levels of IL-10 transcripts in HuT-78 cells. A-C: Quantitative real-time PCR assay for IL-10 in HuT-78 cells treated with vehicle, LY364947 (1  $\mu$ M) (A), BAY11-7082 (1  $\mu$ M) (B), everolimus (10 nM) (C), AZD5363 (1  $\mu$ M) (C), and 5,15-

DPP (20  $\mu$ M) (C) for 6 hr (n=4 for each). Expression levels were expressed as a ratio to ACTB.

Results are expressed as means  $\pm$  S.D. \*\*:  $P < 0.01$  vs. vehicle control.

supplementary Fig. S1

**A**

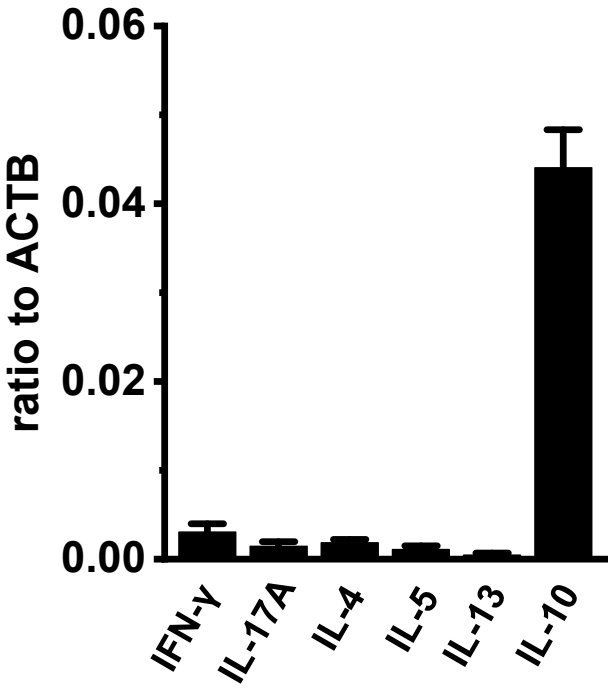

**B**

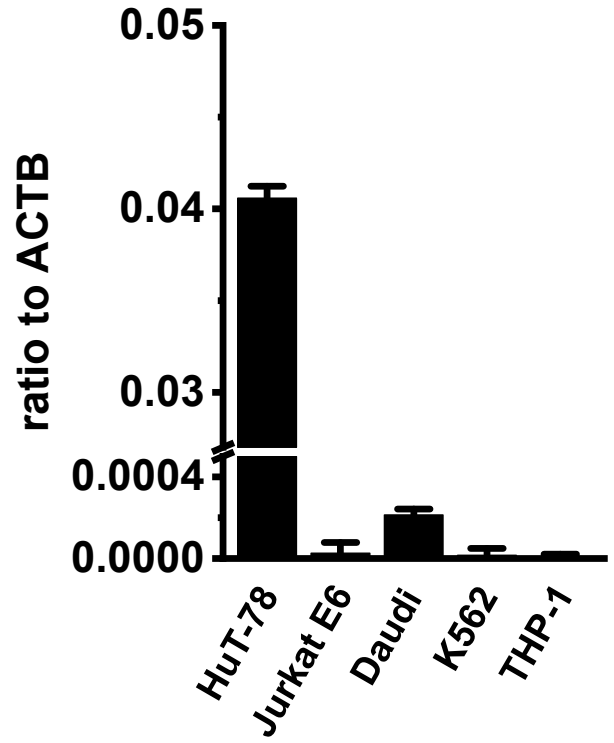

**C**

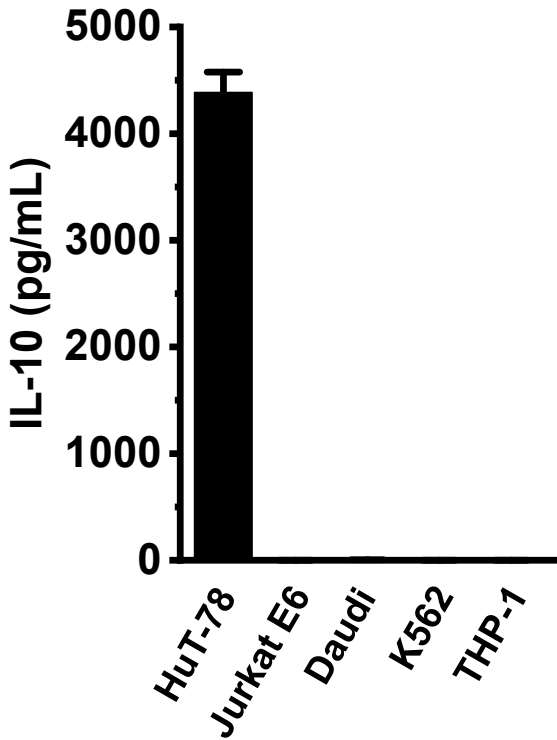

**D**

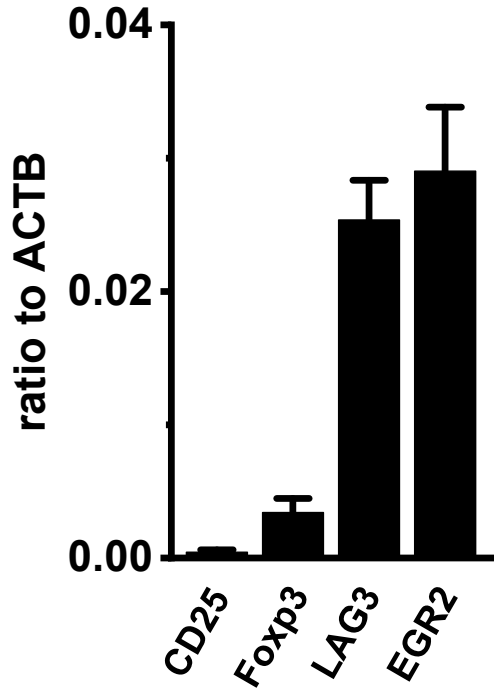

supplementary Fig. S2

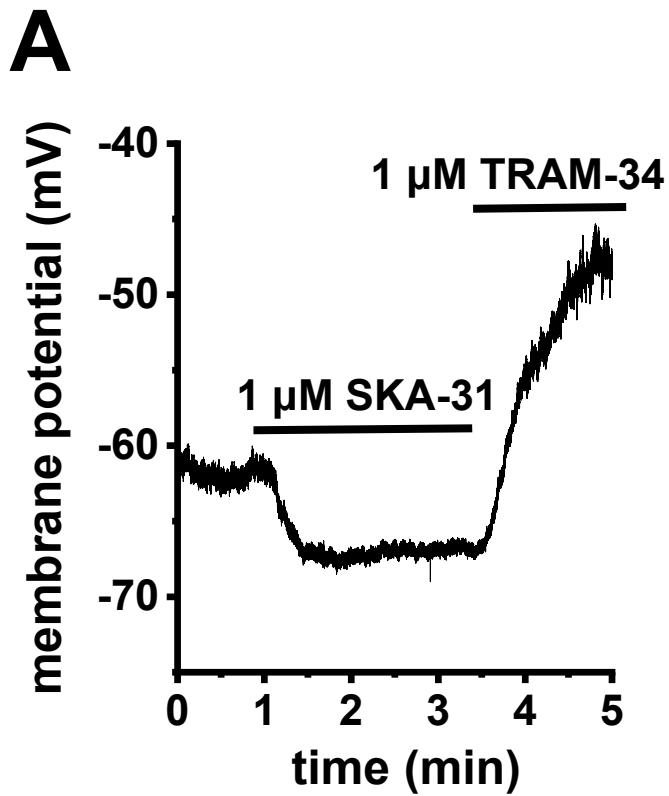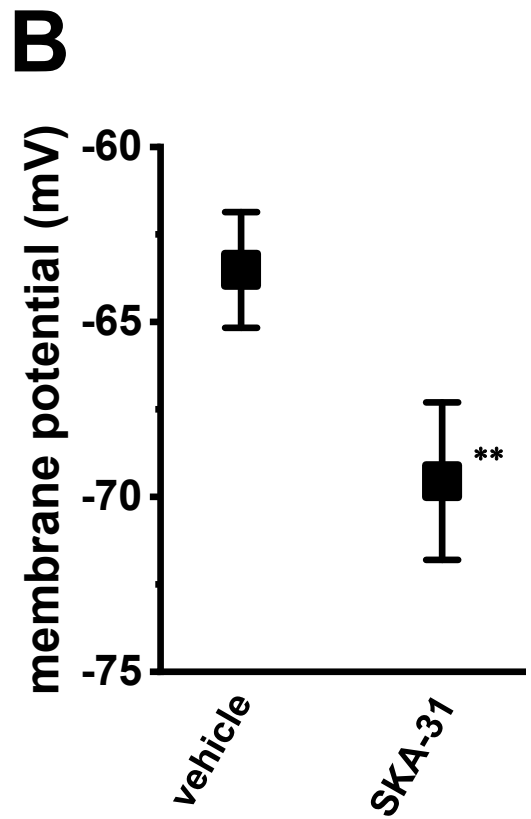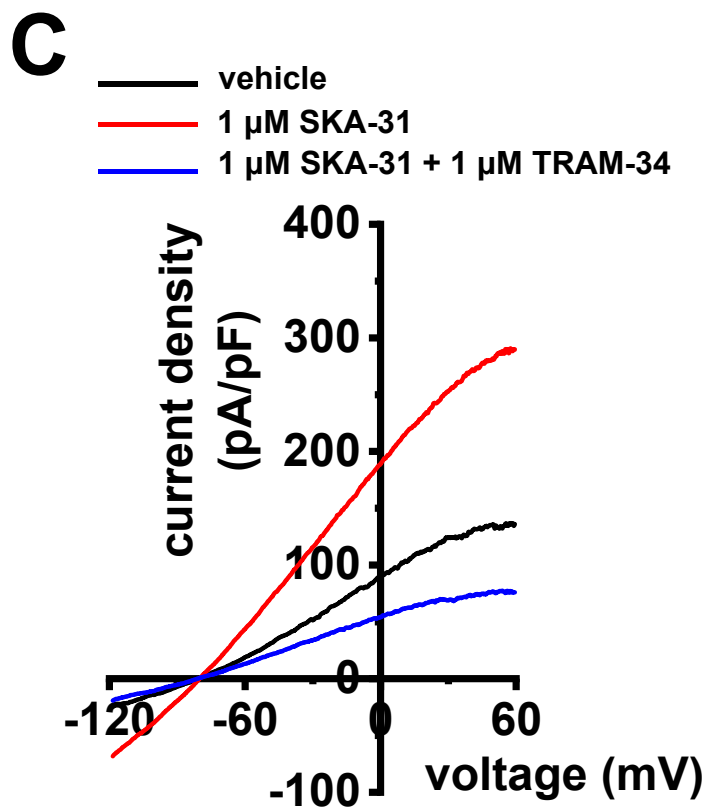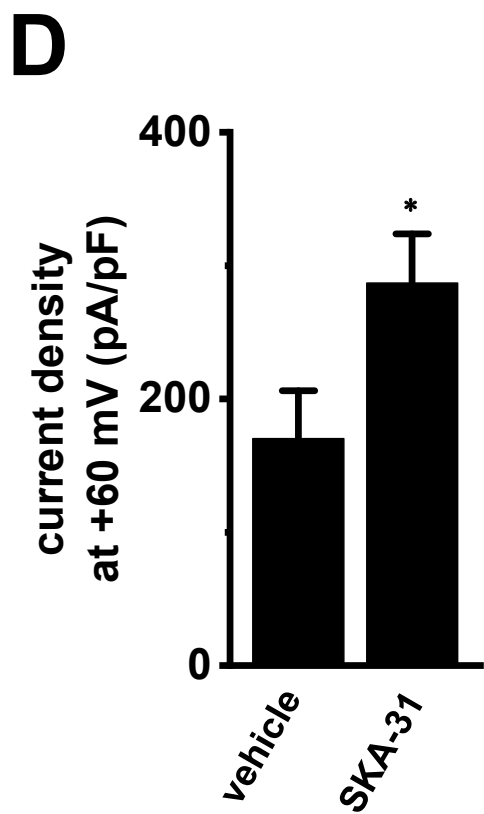

supplementary Fig. S3

**A**

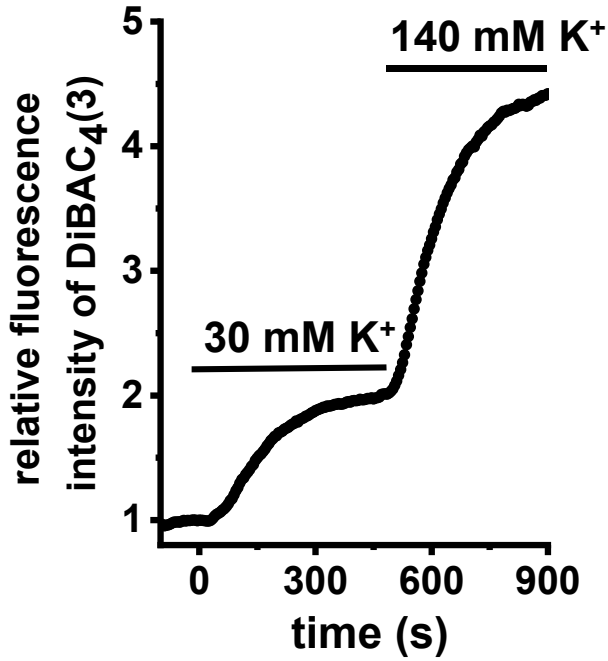

**B**

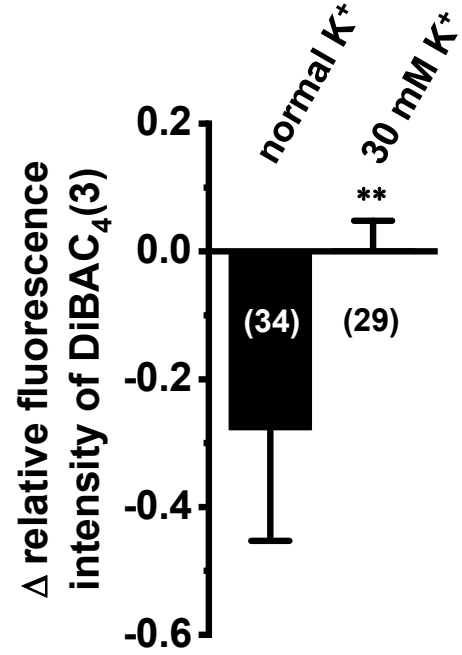

**C**

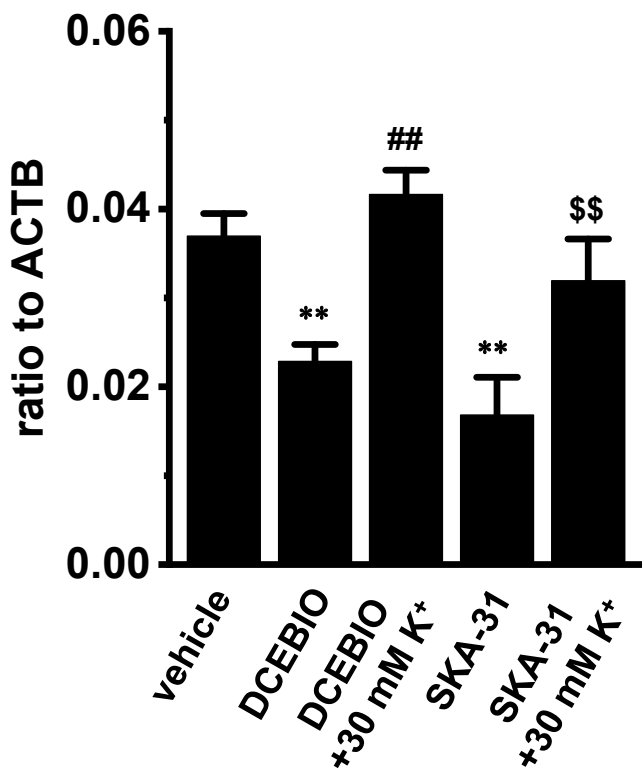

**D**

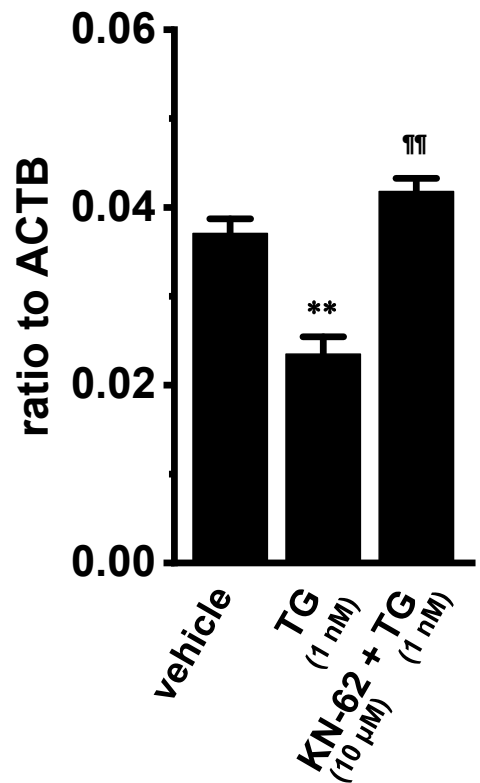

supplementary Fig. S4

**A. vehicle**

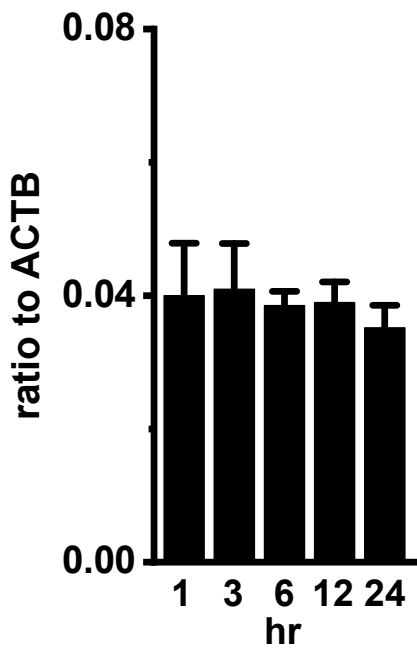

**B. DCEBIO**

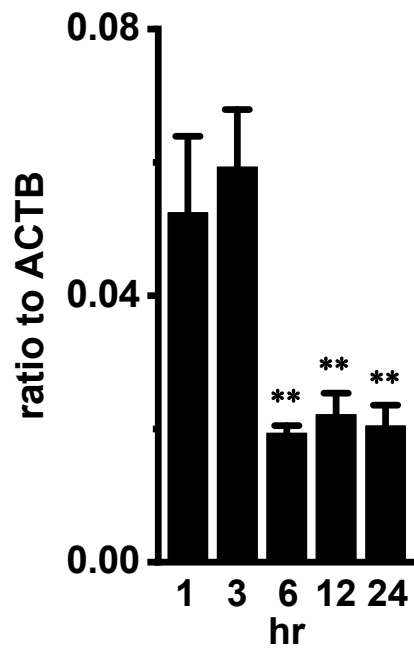

**C. SKA-31**

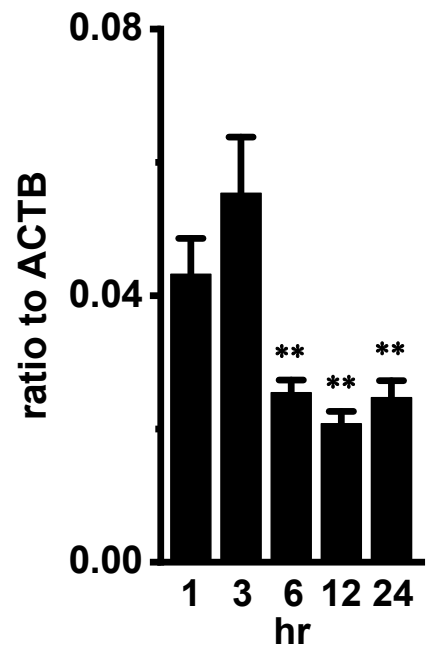



**supplementary Fig. S5**

**A. full images of cropped blots shown in Figure 4**

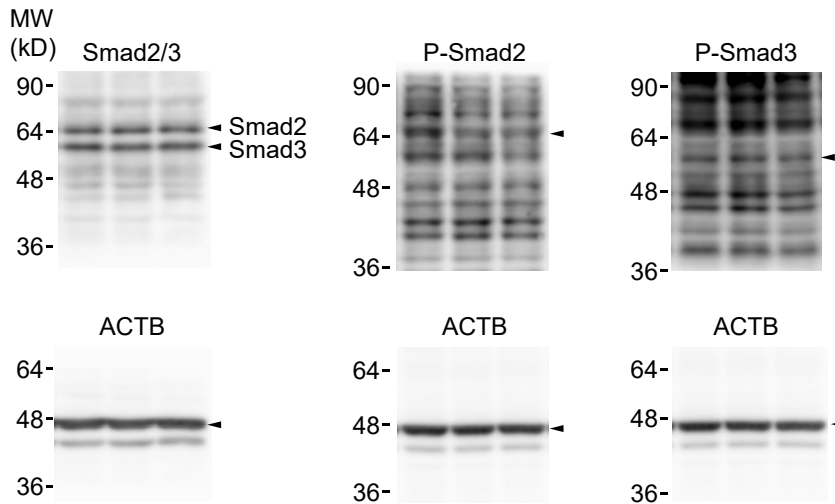

**B. full images of cropped blots shown in Figure 7**

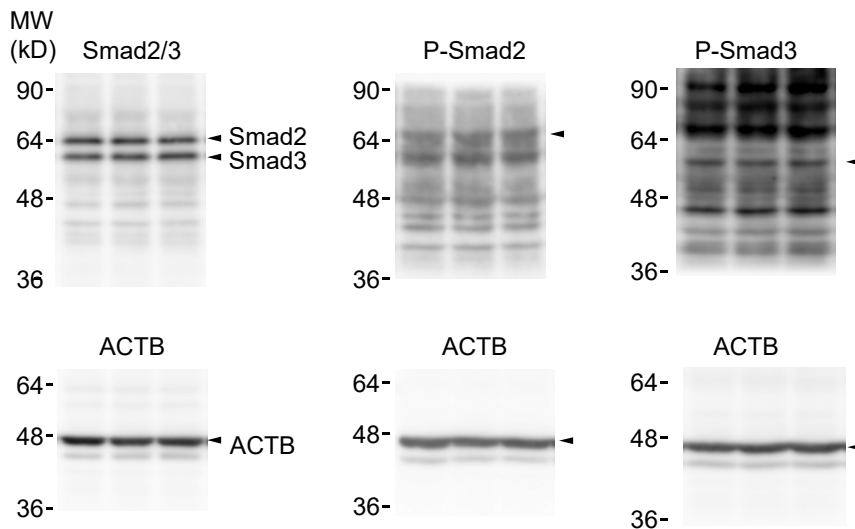

supplementary Fig. S6

**A**

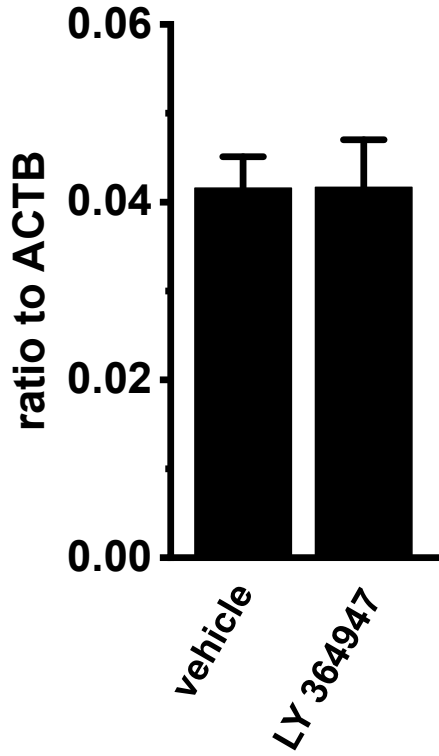

**B**

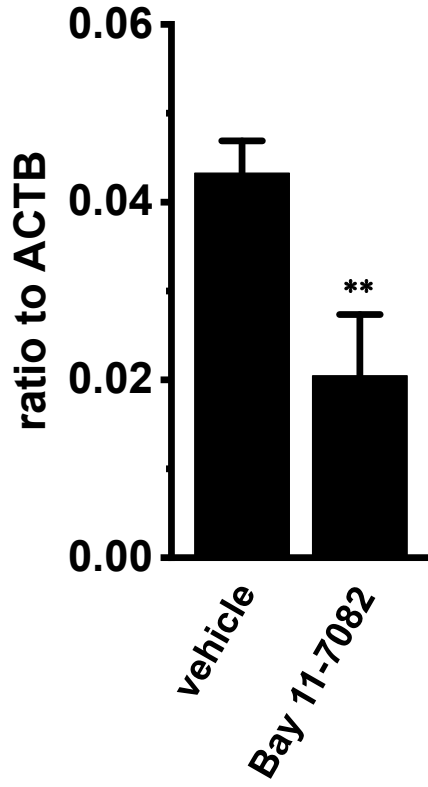

**C**

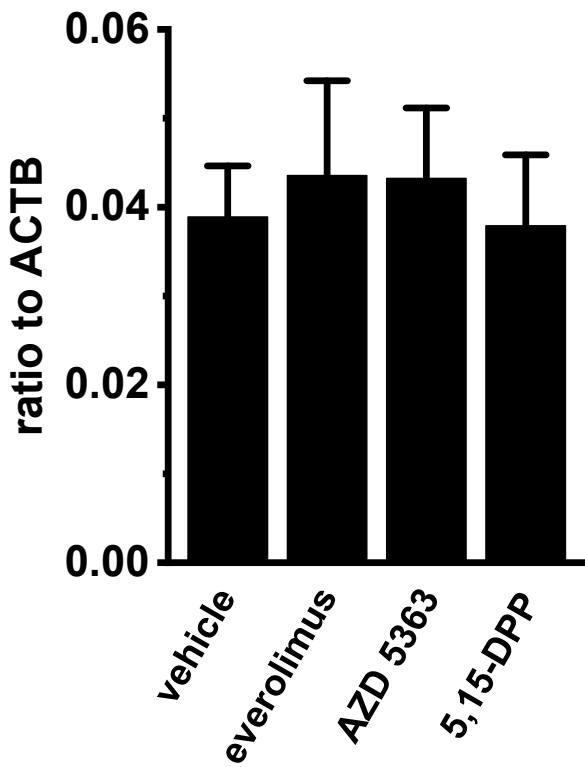

Supplement: supplemental_114405.pdf [file supplemental_114405.pdf]
